# Supplementary material for: Highly efficient grafting of polyvinyl acetate onto cellulose nanocrystals in the aqueous phase
Source: Royal Society of Chemistry journal article supplement (doi:10.1039/d3gc00527e), 2023-01-01
Supplement: d3gc00527e1.pdf [file d3gc00527e1.pdf]

## **Supplementary Information**

### **Highly Efficient Grafting of Polyvinyl Acetate onto Cellulose Nanocrystal in Aqueous Phase**

Yunxiao Liu, Hongze Xu, Lijuan Zhou and Jianming Zhang\*

Key Laboratory of Rubber-Plastics, Ministry of Education/Shandong Provincial, Key Laboratory of  
Rubber-plastics, Qingdao University of Science & Technology, Qingdao266042, China.

## **Experimental section**

### **Materials**

Cotton pulp (DP=900) was supplied by Silver Hawk Co. Ltd. (Gaomi, China). sodium hydroxide (NaOH) and Sodium citrate dihydrate ( $\text{Na}_3\text{C}_6\text{H}_5\text{O}_7 \cdot 2\text{H}_2\text{O}$ ) with analytical grade were purchased from Sinopharm Chemical Reagent Co. Ltd. (Shanghai, China). Cerium ammonium nitrate (CAN), ammonium persulphate (APS), and Arsenazo III were purchased from Aladdin Chemical Reagent Corp.

### **Preparation of cellulose nanocrystals (CNCs)**

CNCs were prepared according to our previous report<sup>1</sup>. Typically, 5 g of cotton pulp and 42.5 g of APS was added to induce the reaction. The reaction was performed at 80 °C for 3 h with vigorous stirring. The as-prepared sample was ultrasonically smashed using an ultrasonic cell disrupter (JY92-IIDN, Ningbo Scientz Biotechnology Co., Ltd, China) for 10 min. After the purification by centrifugation with deionized water at 8000 rpm until the supernatant turned turbid, the CNC suspension with a solid content of around 1 wt% was obtained.

### **Graft Polymerization of VAc on CNCs.**

In the typical preparation procedure of CNCs-PVAc, the 20 mL of a 0.5 wt% CNCs suspension with certain amount of sodium citrate was first degassed by nitrogen bubbling for 20 minutes. Subsequently, 0.04 g CAN and 0.56 g VAc were added to induce the reaction. The reaction was stirred at 35 °C under an airtight surrounding for 2 h. After washed with distilled water and freeze-drying, the CNCs-PVAc powder was gotten. The obtained powder is a mixture (named CNCs-PVAc) and contains both PVAc grafted CNCs (CNCs-g-PVAc) and the PVAc homopolymer. The CNCs-g-PVAc was separated by removing the ungrafted PVAc through the Soxhlet extraction with MeOH for 2 days.

### **Characterization**

The Fourier transform infrared spectroscopy (FT-IR) spectra were collected from 4000 to 400  $\text{cm}^{-1}$  for 32 scans at a resolution of 4  $\text{cm}^{-1}$  using a Bruker VERTEX 70 spectrometer. Before the testing, the CNC-PVAc powder was dispersed in acetone. The obtained CNC-PVAc suspension was dropped on the surface of KBr wafer to form film. The spectra of CNC-PVAc were obtained in transmission mode.

UV-vis spectra were measured using an ultraviolet-visible light spectrophotometer (UV-2550, Shimadzu). For UV-vis measurement, Arsenazo III was prepared into the solution with a concentration of about 0.02 g/L and hydrochloric acid was added to adjust pH to 3.5. The molar ratio of cerium ion to Arsenazo III was kept at 1:1.

Scanning electron microscope (SEM) was performed with a JSM-7500F field emission SEM (JEOL, Japan) at an accelerating voltage of 3 kV. The samples were sputter-coated with gold before SEM observations.

Atomic force microscope (AFM) images were acquired using a Dimension Icon (Bruker, USA) under the intelligent mode. For AFM measurement, dilute CNC-g-PVAc suspensions (0.2 mg/mL in MeOH) suspension was spin-coated on freshly cleaved mica at 2000 rpm for 1 min.

Thermogravimetric analyzer (TGA) measurement was conducted on a NETZSCH TG209 F1 (NETZSCH Instruments, Germany). The temperature was set from 40 to 600  $^{\circ}\text{C}$  with a heating rate of 10  $^{\circ}\text{C min}^{-1}$  in nitrogen atmosphere.

The degradability of the CNC-PVAc film was examined by recording the weight changes as a function of time in soil. Before the test, the CNC-PVAc powder was hot-pressed at 170  $^{\circ}\text{C}$  for 5 minutes. The CNC-PVAc film with a diameter of about 4 cm and a thickness of 150  $\mu\text{m}$  was obtained. The degradation test is conducted at ambient temperature.

Prior to GPC testing, the CNC-PVAc was subjected to Soxhlet extraction with methanol for 2 days to separate the CNC-g-PVAc and homopolymerized PVAc. To determine the molecular weight of grafted PVAc, CNC was removed using 72% sulfuric acid in accordance with previous work<sup>2</sup>. During the sulfuric acid treatment, the grafted PVAc was converted to PVA. The  $M_n$  of the grafted PVAc was

then analyzed using GPC (Wyatt, USA) equipped with DAWN-HELEOS-II and Optilab detector. The RID was operated at 25 °C and eluted with a 200 mM sodium chloride solution and 0.2 % sodium azide at a flow rate of 0.5 mL/min. In addition, the  $M_n$  of the homopolymerized PVAc was determined by GPC (TOSOH HLC-8320, Japan) analyses using tetrahydrofuran (THF) as the mobile phase, and the PS standard was used for calibration. Samples were dissolved in THF at a concentration of 1 mg/mL, and the flow rate of the mobile phase in GPC was maintained at 0.35 mL/min.

Solid-state nuclear magnetic resonance (SSNMR) experiments were performed on a Bruker Advance III HD 400 spectrometer operating at a Larmor frequency of 100.64 MHz for  $^{13}\text{C}$ .

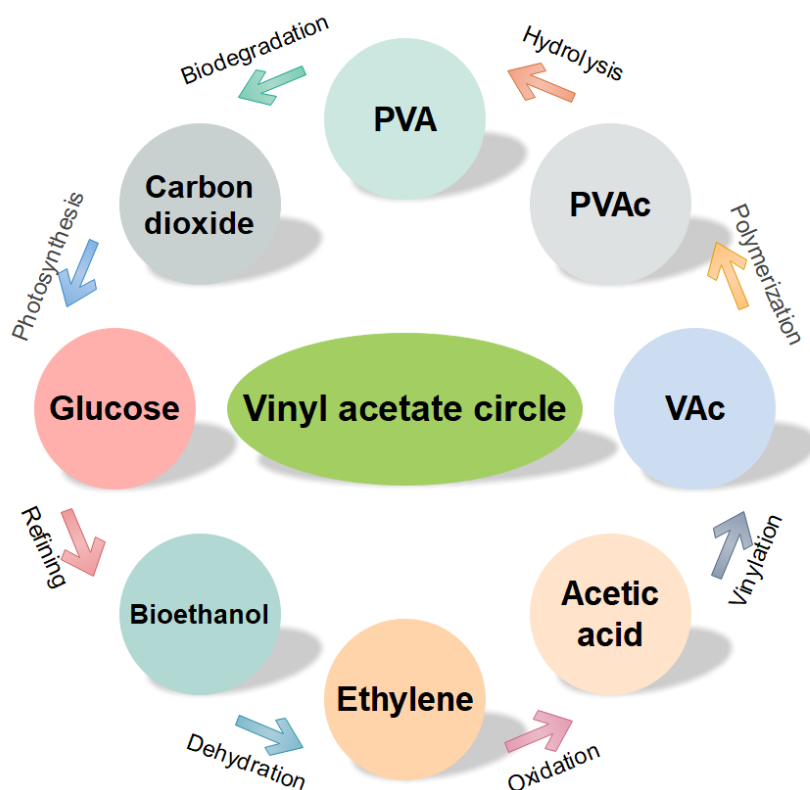

Fig. S1 Vision of the “vinyl acetate circle” wholly based on ethanol as a raw material source.

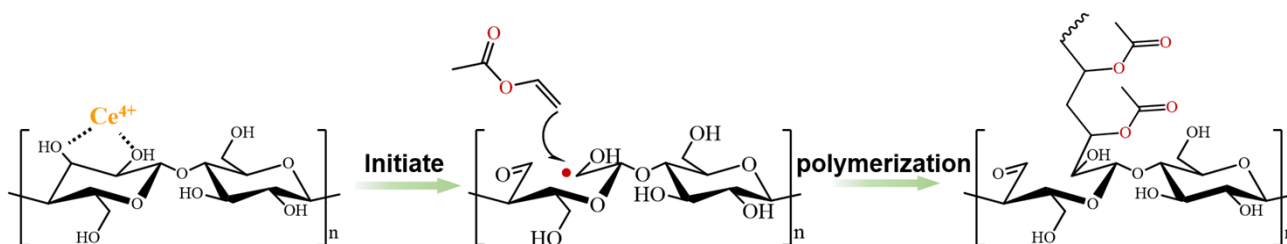

Fig. S2 Grafting mechanism of PVAc on CNC surface.

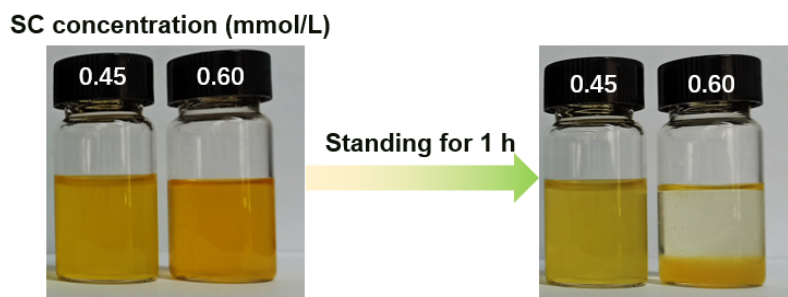

Fig. S3 State of CAN solution standing for 1h at SC concentration of 0.45 and 0.60 mmol/L.

Table S1 Effect of CAN concentration on grafting yield, grafting efficiency and conversion rate.

| Entry                      | CAN<br>(mmol/L) | Grafting yields<br>(%) | Conversion rate<br>(%) | Grafting efficiency<br>(%) |
|----------------------------|-----------------|------------------------|------------------------|----------------------------|
| CNC-PVAc <sub>3.6-45</sub> | 3.6             | 241.95±0.92            | 82.93±2.74             | 49.52±2.01                 |
| CNC-PVAc <sub>3.2-45</sub> | 3.2             | 253.50±6.50            | 84.87±2.74             | 49.52±2.01                 |
| CNC-PVAc <sub>2.7-45</sub> | 2.7             | 259.35±1.20            | 82.47±0.02             | 56.35±0.28                 |
| CNC-PVAc <sub>2.3-45</sub> | 2.3             | 189.45±12.23           | 57.44±3.07             | 59.09±0.66                 |
| CNC-PVAc <sub>1.8-45</sub> | 1.8             | 97.60±19.09            | 51.24±3.40             | 33.98±4.42                 |

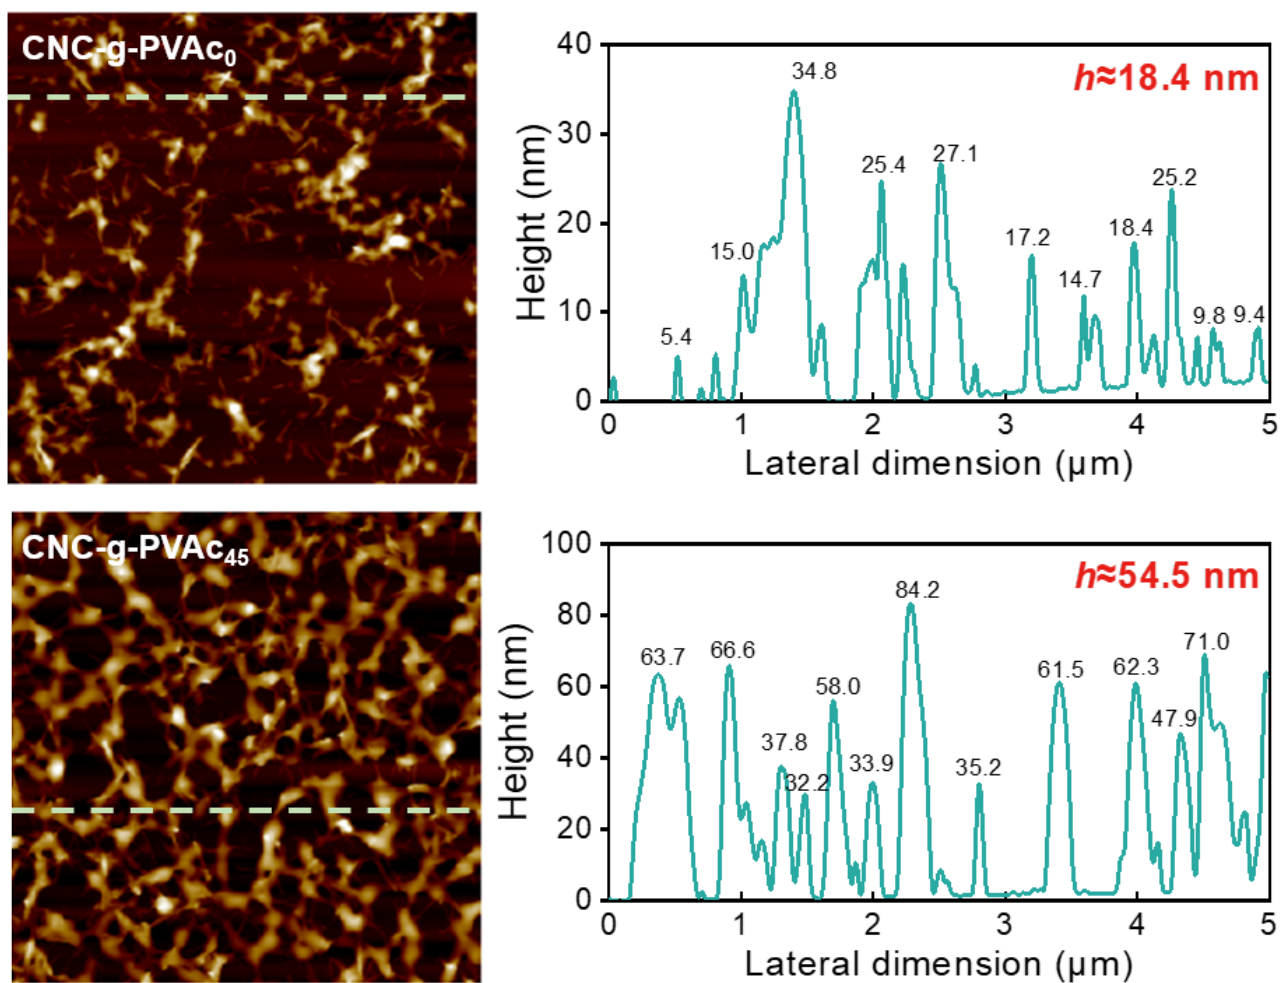

Fig. S4 AFM height comparison of CNC-g-PVAc<sub>0</sub> and CNC-g-PVAc<sub>45</sub>.

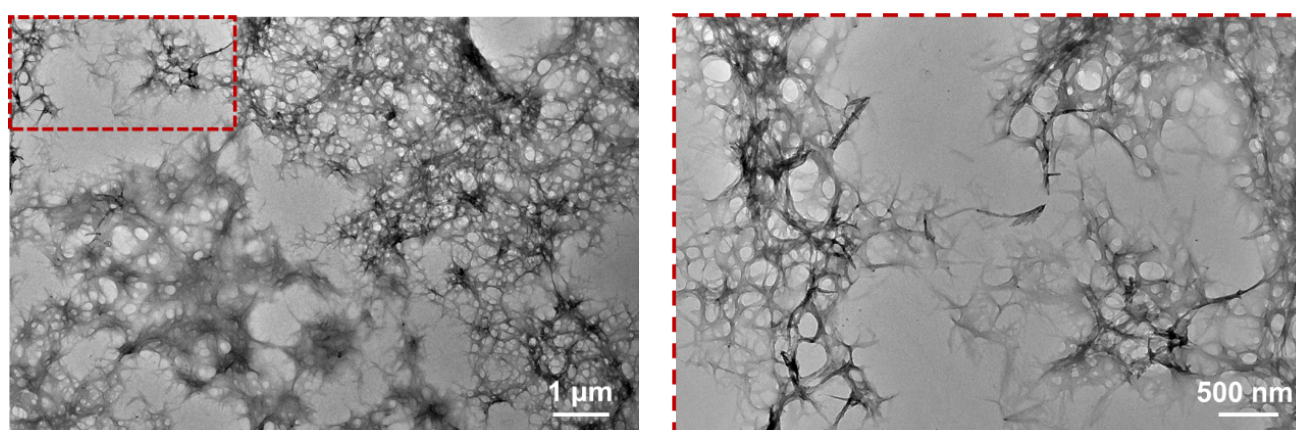

Fig. S5 TEM images of CNC-g-PVAc<sub>45</sub>.

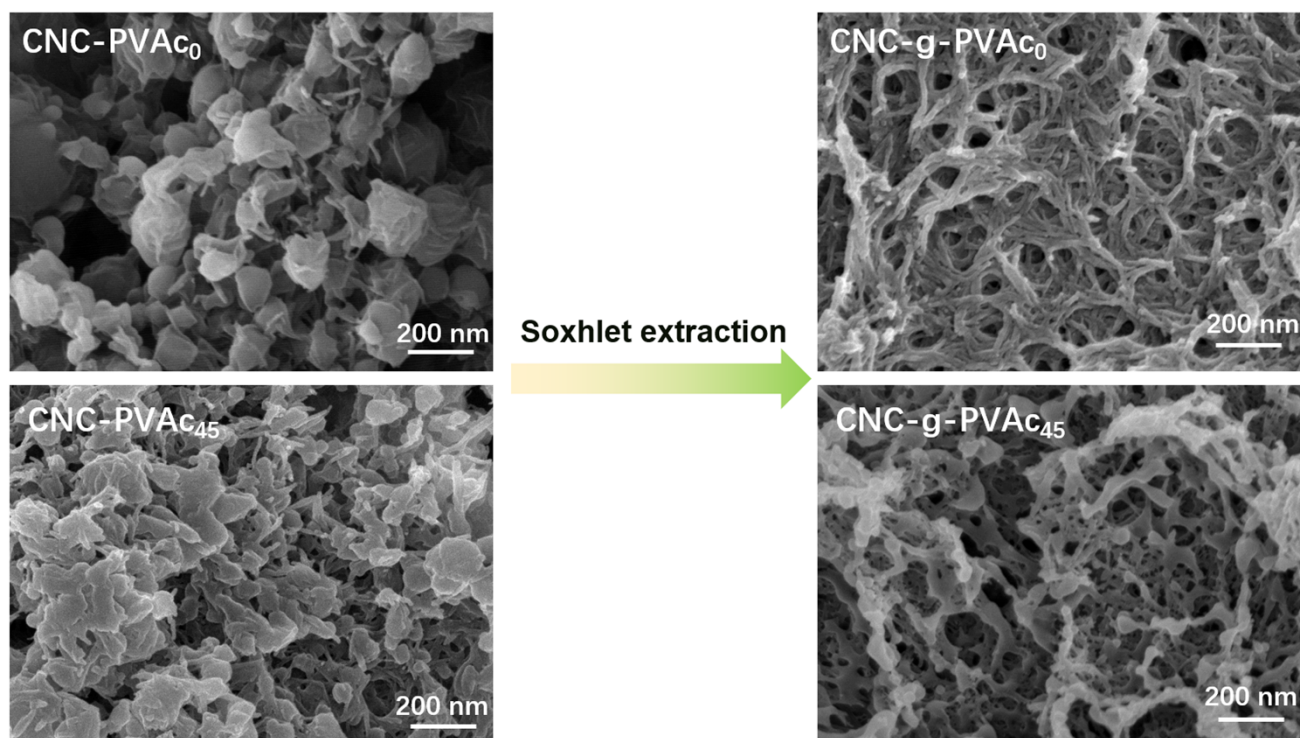

Fig. S6 SEM images of CNC-PVAc and CNC-g-PVAc powder.

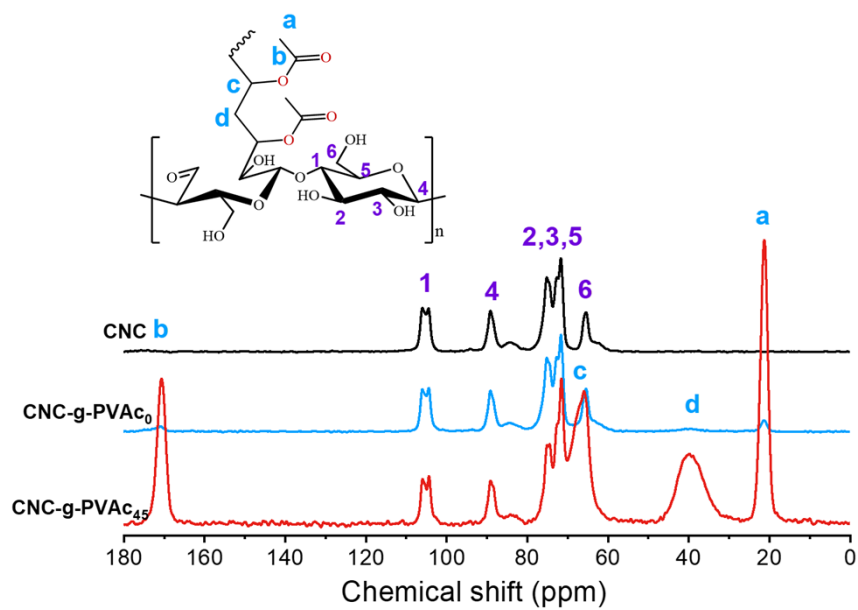

Fig. S7 Solid-state <sup>13</sup>C NMR spectra of CNC, CNC-g-PVAc<sub>0</sub> and CNC-g-PVAc<sub>45</sub>.

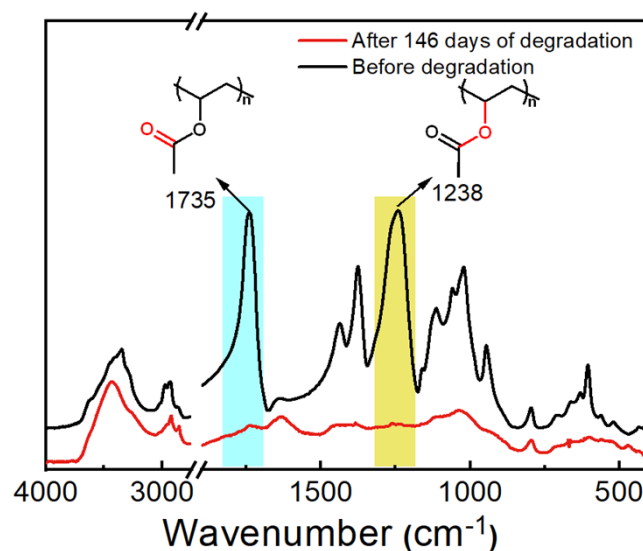

Fig. S8 Comparison of FT-IR spectra of CNC-PVAc film before degradation and 146 days after soil burial.

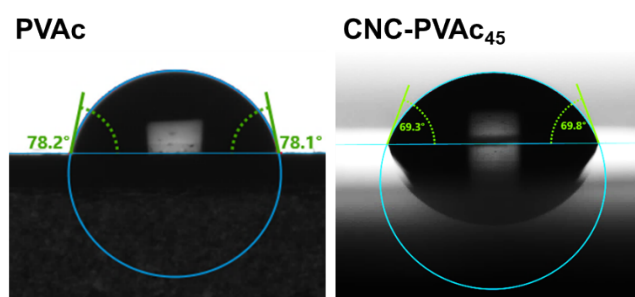

Fig. S9 Water contact angle of PVAc and CNC-PVAc<sub>45</sub>.

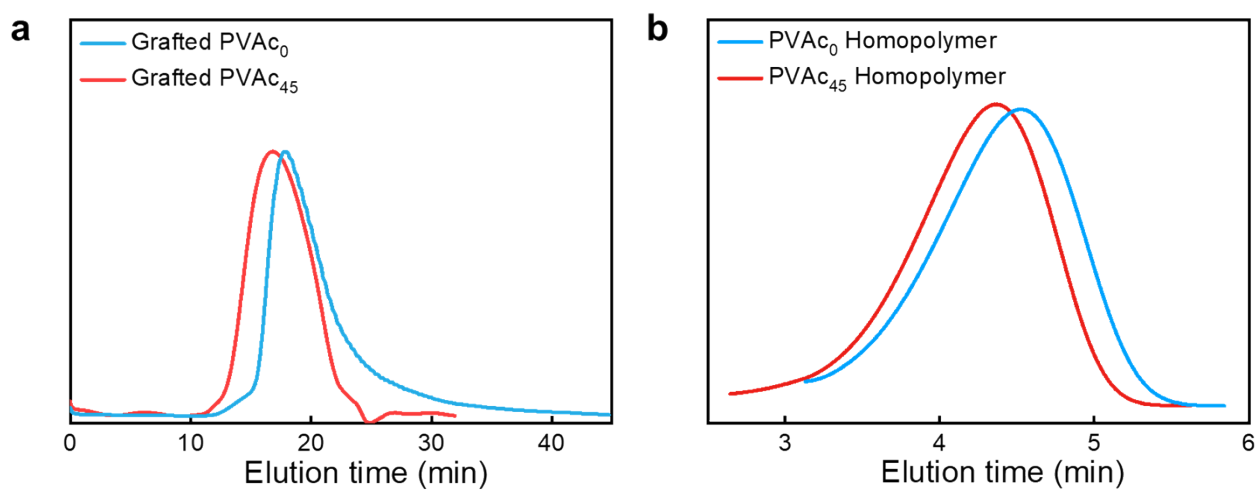

Fig. S10 GPC curves of (a) grafted PVAc and (b) PVAc homopolymers.



Table S2 The molecular weight of surface-grafted PVAc and PVAc homopolymer

| Entry                  | surface-grafted PVAc |      |                                                              | PVAc homopolymer  |       |
|------------------------|----------------------|------|--------------------------------------------------------------|-------------------|-------|
|                        | $M_n$<br>(kg/mol)    | $D$  | $\sigma_{\text{grafts}} * 10^2$<br>(chains/nm <sup>2</sup> ) | $M_n$<br>(kg/mol) | $D$   |
| CNC-PVAc <sub>0</sub>  | 75.31                | 1.96 | 0.55                                                         | 27.18             | 9.29  |
| CNC-PVAc <sub>45</sub> | 269.9                | 2.50 | 1.28                                                         | 40.01             | 11.42 |

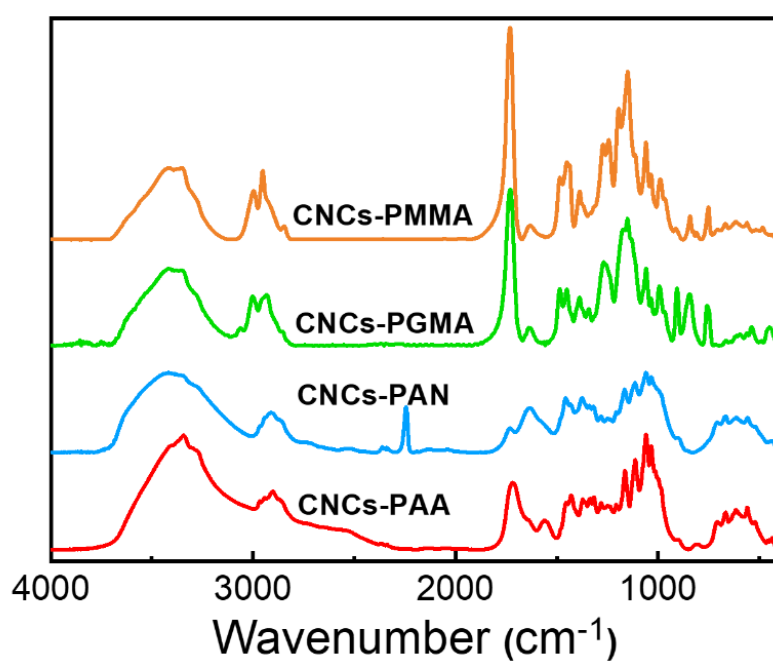

Fig. S11 FTIR spectra of the CNC-PMMA, CNC-PGMA, CNC-PAN and CNC-PAA.

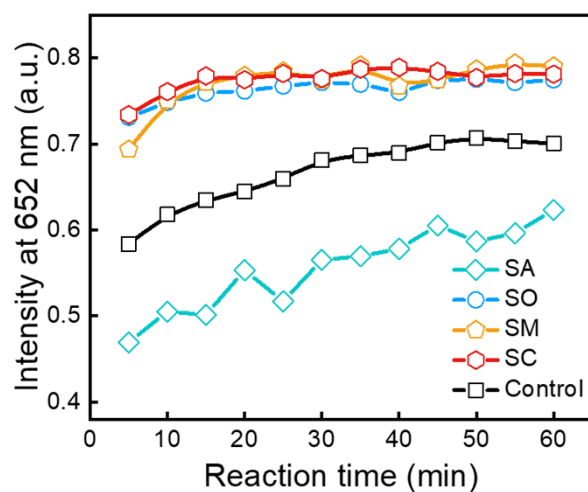

Fig. S12 Effect of Carboxylates type Absorbance intensity at 652 nm of CNC/CAN/Arsenazo III mixtures with the initiation time of 5-60 minutes.

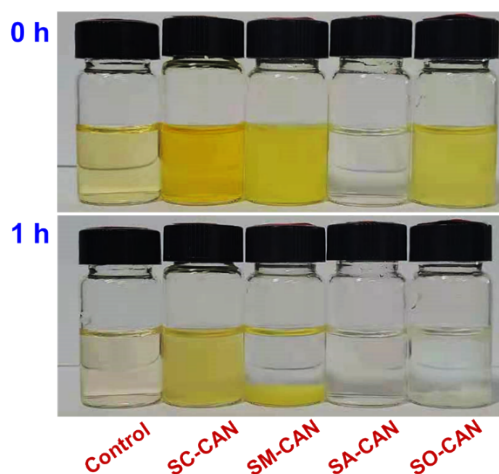

Fig. S13 Status of CAN in different carboxylate solutions when stored for 0 and 1h.

1. Y. Liu, L. Liu, K. Wang, H. Zhang, Y. Yuan, H. Wei, X. Wang, Y. Duan, L. Zhou and J. Zhang, *Carbohydr. Polym.*, 2020, 229, 115572.
2. K. Littunen, U. Hippi, L.-S. Johansson, M. Österberg, T. Tammelin, J. Laine and J. Seppälä, *Carbohydr. Polym.*, 2011, 84, 1039-1047.
